# Supplementary figures and images for: A programmable microfluidic cell array for combinatorial drug screening
Source: Royal Society of Chemistry journal article supplement (doi:10.1039/c2lc21202a), 2012-01-01

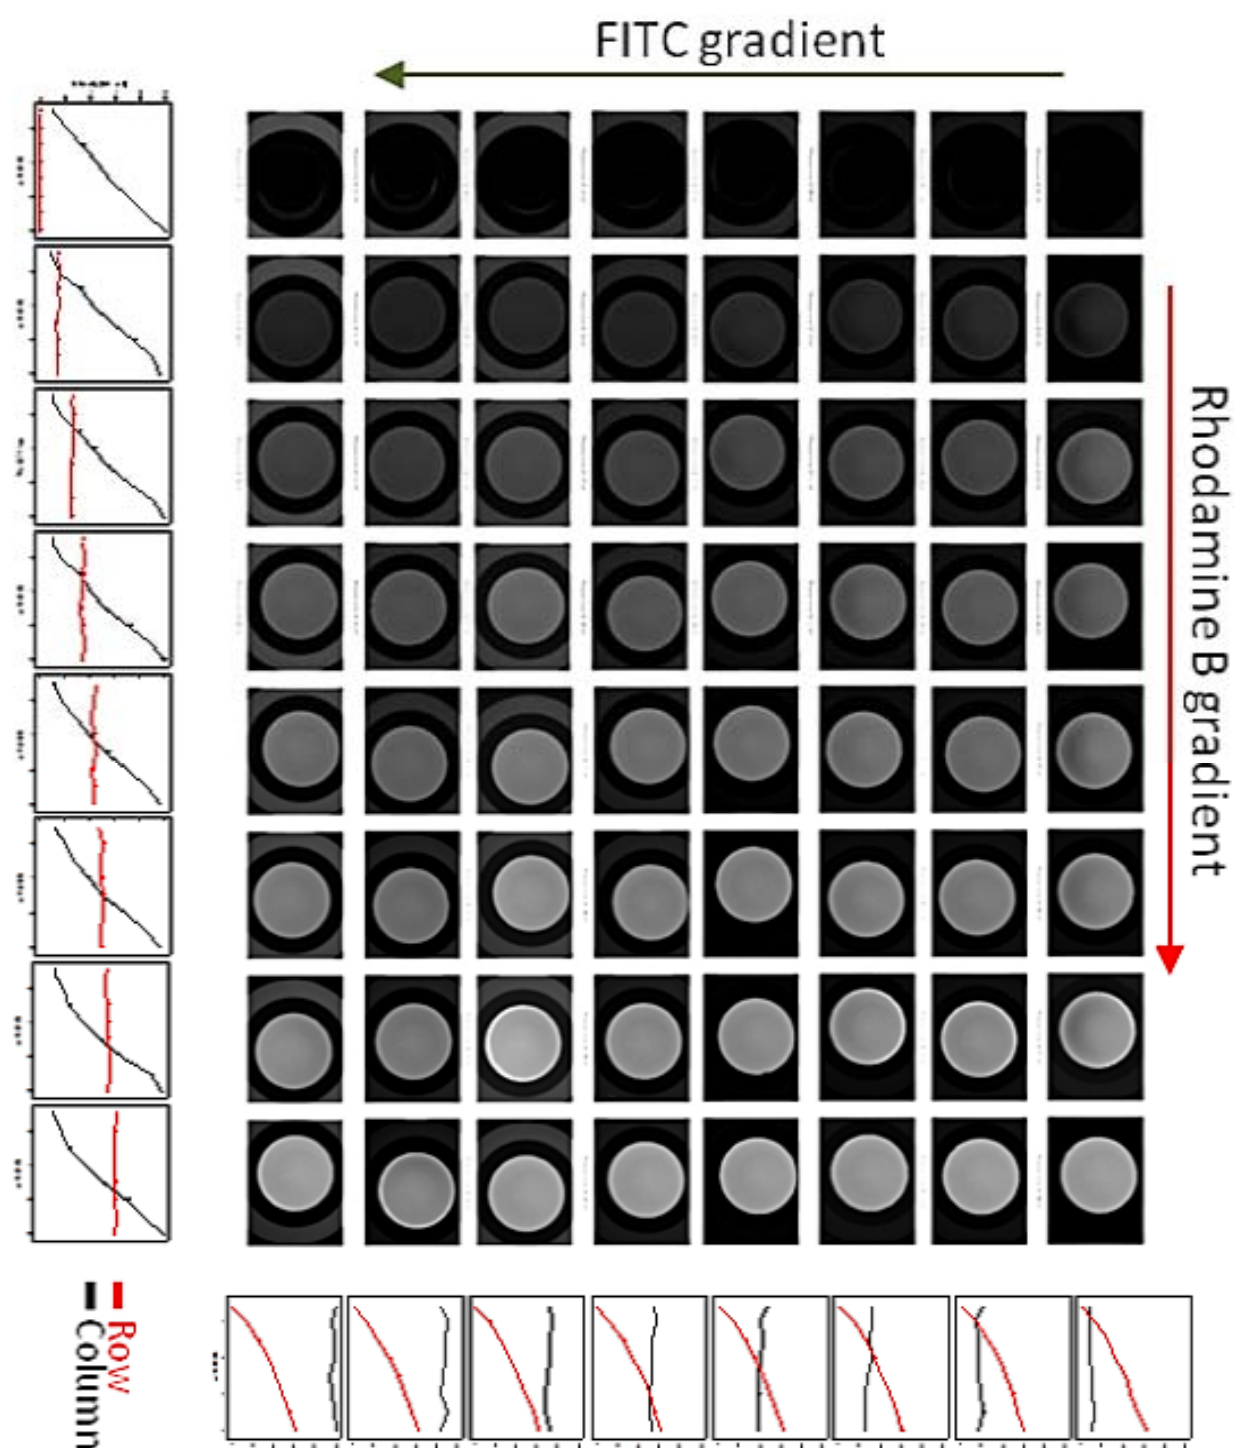

Supplement: c2lc21202a.pdf [file c2lc21202a.pdf]
